# Supplementary material
Source: publisher figshare collection journal article supplement (https://karger.figshare.com/ndownloader/files/17616749)
Supplement: Supplementary file 1 [file 17616749]

| **Supplemental table 3.** Hemoglobin concentration and coagulation indicators at the baseline and after CVVH treatment in the matched cohort | | | | | | |
| --- | --- | --- | --- | --- | --- | --- |
| Variables | No-anticoagulation  (n = 18) | RCA  (n = 18) | | | | *P* value |
| Hemoglobin (g/L), mean ±SD | | | |
| Before treatment | 117.6 ± 33.8 | 115.4 ± 27.1 | | | | 0.833 |
| After treatment | 107.94 ± 28.5 | 115.5 ± 30.7 | | | | 0.480 |
| ΔHb | -11.6 ± 21.6 | 1.27 ± 31.1 | | | | 0.190 |
| P value | 0.377 | 0.993 | | | |  |
| Platelet count (109/L), mean ± SD | | | | |
| Before treatment | 114.5 ± 92.3 | 117.6 ± 61.0 | | | | 0.908 |
| After treatment | 61.3 ± 37.5 | 104.1 ± 92.7 | | | | 0.099 |
| ΔPLT | -61.6 ± 67.8 | -21.5 ± 76.2 | | | | 0.132 |
| P value | 0.035 | 0.620 | | | |  |
| PT(s), mean ± SD | | |
| Before treatment | 17.0 ± 10.8 | 15.0 ± 4.9 | | | | 0.489 |
| After treatment | 15.0 ± 2.3 | 15.2 ± 3.4 | | | | 0.818 |
| ΔPT | -0.9 ± 2.5 | 0.2 ± 2.7 | | | | 0.258 |
| P value | 0.518 | 0.892 | | | |  |
| APTT(s), mean ± SD | | |
| Before treatment | 29.6 ± 13.8 | 37.6 ± 29.2 | | | | 0.303 |
| After treatment | 32.9 ± 11.2 | 42.0 ± 13.5 | | | | 0.074 |
| ΔAPTT | 6.9 ± 12.2 | 1.1 ± 31.9 | | | | 0.547 |
| P value | 0.483 | 0.618 | | | |  |

*PT* prothrombin time, *APTT* activated partial thromboplastin time
